# Supplementary material
Source: ML conference proceedings conference paper supplement (https://openaccess.thecvf.com/content/ICCV2023/html/Liang_Learning_Non-Local_Spatial-Angular_ICCV_2023_paper.html)
Supplement: Supplementary file 1 [file Liang_Learning_Non-Local_Spatial-Angular_ICCV_2023_supplemental.pdf]

# Learning Non-Local Spatial-Angular Correlation for Light Field Image Super-Resolution (*Supplemental Material*)

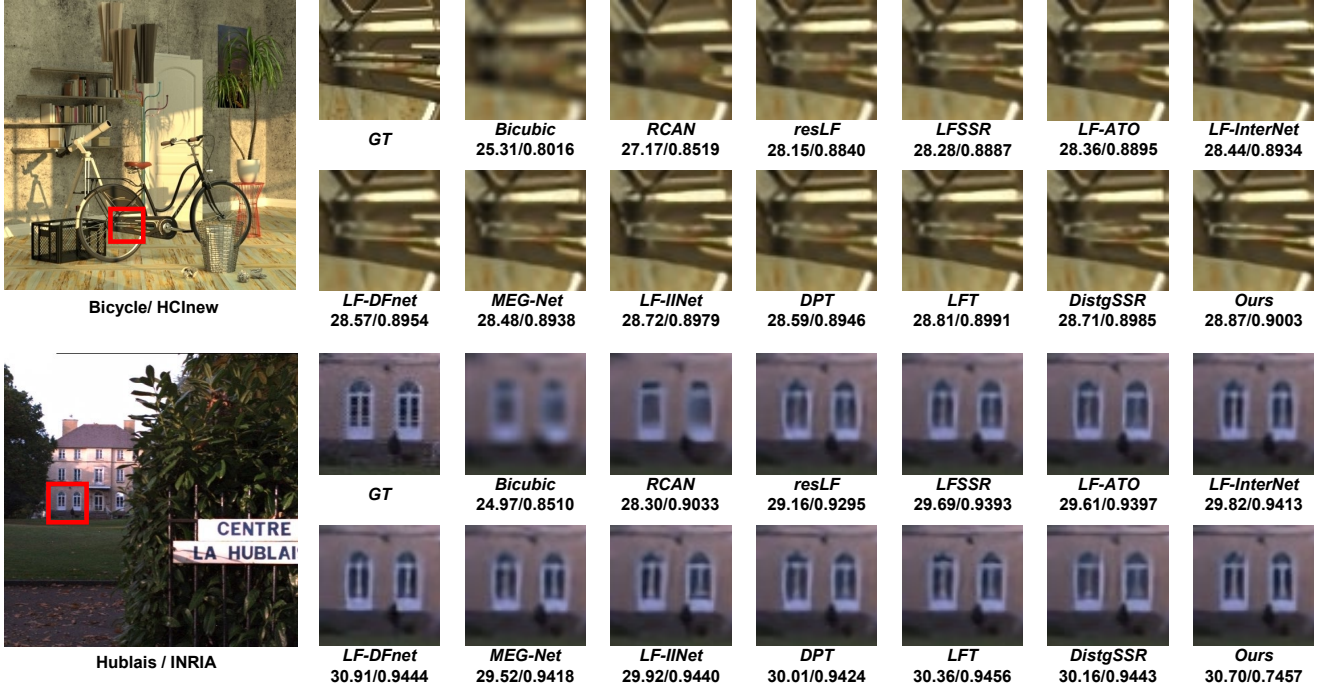

Figure I. Qualitative comparison of different SR methods for  $4\times$  SR.

Section A provides more visual comparisons on the light field (LF) datasets, and presents additional comparisons on LFs with different angular resolution. Section B presents detailed quantitative results of different methods on each dataset with various sheared values. Section C describes additional experiments for LF angular SR, and shows visual results achieved by different methods.

## A. Additional Comparisons on Benchmarks

### A.1. Qualitative Results

In this subsection, we show more visual comparisons of  $4\times$  SR on the benchmark dataset in Fig. I. It can be observed that the proposed EPIT recovers richer and more realistic details.

### A.2. Robustness to Different Angular Resolution

In the main body of our paper, we have illustrated that our EPIT (trained on central  $5\times 5$  SAIs) achieves competitive PSNR scores on other angular resolutions, as compared to top-performing DistgSSR [60]. In Table I, we provide

more quantitative results achieved by the state-of-the-art methods with different angular resolutions.

In addition, we train a series of EPIT models from scratch on  $2\times 2$ ,  $3\times 3$  and  $4\times 4$  SAIs, respectively. It can be observed from Table II that when using larger angular resolution SAIs as training data, e.g.,  $5\times 5$ , our method can achieve better SR performance on different angular resolutions. That is because, more angular views are beneficial for our EPIT to learn the spatial-angular correlation better. This phenomenon inspires us to explore the intrinsic mechanism of LF processing tasks in the future.

## B. Additional Quantitative Comparison on Disparity Variations

We have presented the performance comparison on two selected scenes with different shearing values for  $2\times$  SR in the main paper. Here, we provide quantitative results on each dataset in Table III and Fig. II. It can be observed that our EPIT achieves more consistent performance than existing methods with respect to disparity variations on various datasets.

Table I. PSNR/SSIM values achieved by different methods with different angular resolution for  $4\times$  SR.

| Datasets      |             | Methods      |              |                |            |                   |
|---------------|-------------|--------------|--------------|----------------|------------|-------------------|
|               |             | <i>resLF</i> | <i>LFSSR</i> | <i>MEG-Net</i> | <i>LFT</i> | <i>EPIT(ours)</i> |
| EPFL [48]     | $2\times 2$ | -            | 26.00/8541   | 26.40/8667     | 27.64/8953 | 28.22/9024        |
|               | $3\times 3$ | 28.13/9012   | 26.84/8750   | 27.16/8834     | 28.12/9029 | 28.74/9103        |
|               | $4\times 4$ | -            | 27.62/8930   | 28.04/9036     | 28.43/9087 | 29.04/9164        |
|               | $5\times 5$ | 28.27/9035   | 28.27/9118   | 28.74/9160     | 29.85/9210 | 29.34/9197        |
|               | $6\times 6$ | -            | 27.62/8995   | 28.46/9115     | 28.45/9101 | 29.43/9218        |
|               | $7\times 7$ | 27.91/9038   | 27.29/8889   | 28.30/9083     | 28.55/9094 | 29.60/9231        |
|               | $8\times 8$ | -            | 27.06/8834   | 28.15/9061     | 28.37/9064 | 29.60/9240        |
|               | $9\times 9$ | 26.07/8881   | 26.95/8810   | 28.12/9046     | 28.45/9071 | 29.71/9246        |
| HCInew [21]   | $2\times 2$ | -            | 28.44/8639   | 29.02/8782     | 29.94/8960 | 30.84/9114        |
|               | $3\times 3$ | 30.63/9089   | 29.47/8848   | 29.84/8943     | 30.28/9031 | 31.23/9182        |
|               | $4\times 4$ | -            | 30.22/8997   | 30.68/9094     | 30.51/9065 | 31.40/9213        |
|               | $5\times 5$ | 30.73/9107   | 30.72/9145   | 31.10/9177     | 31.46/9218 | 31.51/9231        |
|               | $6\times 6$ | -            | 30.24/9053   | 30.91/9154     | 30.26/9009 | 31.57/9241        |
|               | $7\times 7$ | 30.23/9112   | 29.89/8997   | 30.64/9125     | 30.05/8975 | 31.63/9250        |
|               | $8\times 8$ | -            | 29.68/8969   | 30.48/9105     | 29.81/8923 | 31.66/9256        |
|               | $9\times 9$ | 27.84/8967   | 26.46/8942   | 29.77/8916     | 29.71/8916 | 31.69/9260        |
| HCold [65]    | $2\times 2$ | -            | 33.37/9413   | 34.17/9489     | 35.52/9591 | 36.94/9690        |
|               | $3\times 3$ | 36.61/9674   | 34.72/9535   | 35.26/9579     | 35.91/9616 | 37.37/9717        |
|               | $4\times 4$ | -            | 35.80/9615   | 36.42/9662     | 36.15/9634 | 37.52/9729        |
|               | $5\times 5$ | 36.71/9682   | 36.70/9696   | 37.28/9716     | 37.63/9735 | 37.68/9737        |
|               | $6\times 6$ | -            | 35.32/9617   | 36.75/9688     | 36.21/9636 | 37.76/9744        |
|               | $7\times 7$ | 36.21/968    | 34.94/9578   | 36.35/9662     | 36.10/9629 | 37.92/9749        |
|               | $8\times 8$ | -            | 34.70/9558   | 36.18/9651     | 35.73/9596 | 38.00/9754        |
|               | $9\times 9$ | 33.55/9519   | 34.46/9539   | 36.08/9644     | 35.71/9593 | 38.06/9756        |
| INRIA [46]    | $2\times 2$ | -            | 27.83/9035   | 28.31/9125     | 29.99/9378 | 30.52/9418        |
|               | $3\times 3$ | 30.33/9413   | 28.78/9201   | 29.16/9264     | 30.35/9424 | 30.94/9472        |
|               | $4\times 4$ | -            | 29.59/9327   | 30.00/9401     | 30.64/9457 | 31.19/9509        |
|               | $5\times 5$ | 30.34/9412   | 30.31/9467   | 30.66/9490     | 31.20/9524 | 31.27/9526        |
|               | $6\times 6$ | -            | 29.50/9356   | 30.38/9443     | 30.61/9457 | 31.45/9533        |
|               | $7\times 7$ | 29.82/9398   | 29.05/9269   | 30.13/9415     | 30.56/9443 | 31.51/9539        |
|               | $8\times 8$ | -            | 28.76/9221   | 30.02/9399     | 30.41/9422 | 31.54/9540        |
|               | $9\times 9$ | 27.65/9226   | 28.58/9196   | 29.97/9386     | 30.43/9420 | 31.56/9539        |
| STgantry [53] | $2\times 2$ | -            | 27.29/8710   | 28.15/8944     | 29.69/9263 | 31.30/9468        |
|               | $3\times 3$ | 30.05/9348   | 28.81/9064   | 29.22/9161     | 30.05/9316 | 31.86/9534        |
|               | $4\times 4$ | -            | 29.77/9254   | 30.30/9356     | 30.35/9359 | 32.11/9558        |
|               | $5\times 5$ | 30.19/9372   | 30.15/9426   | 30.77/9453     | 31.86/9548 | 32.18/9571        |
|               | $6\times 6$ | -            | 29.79/9320   | 30.58/9428     | 30.01/9289 | 32.31/9580        |
|               | $7\times 7$ | 29.71/9375   | 29.40/9257   | 30.25/9393     | 29.53/9208 | 32.40/9585        |
|               | $8\times 8$ | -            | 29.12/9211   | 30.03/9367     | 29.17/9135 | 32.48/9591        |
|               | $9\times 9$ | 27.23/9224   | 28.85/9169   | 29.83/9344     | 29.06/9110 | 32.50/9592        |

Table II. PSNR/SSIM values achieved by our EPIT trained on LFs with different angular resolution for  $4\times$  SR.

| Datasets      |             | <i>EPIT(ours)*</i> |             |             |             |
|---------------|-------------|--------------------|-------------|-------------|-------------|
|               |             | $2\times 2$        | $3\times 3$ | $4\times 4$ | $5\times 5$ |
| EPFL [48]     | $2\times 2$ | 28.40/9037         | 28.45/9040  | 28.33/9034  | 28.22/9024  |
|               | $3\times 3$ | 28.61/9076         | 28.75/9090  | 28.67/9090  | 28.74/9103  |
|               | $4\times 4$ | 28.69/9108         | 28.90/9131  | 28.86/9137  | 29.04/9164  |
|               | $5\times 5$ | 28.81/9124         | 29.08/9152  | 29.06/9162  | 29.34/9197  |
|               | $6\times 6$ | 28.81/9133         | 29.13/9168  | 29.12/9180  | 29.43/9218  |
|               | $7\times 7$ | 28.88/9137         | 29.24/9176  | 29.24/9190  | 29.60/9231  |
|               | $8\times 8$ | 28.86/9140         | 29.25/9184  | 29.25/9198  | 29.60/9240  |
|               | $9\times 9$ | 28.92/9141         | 29.32/9188  | 29.34/9204  | 29.71/9246  |
| HCInew [21]   | $2\times 2$ | 30.81/9109         | 30.86/9116  | 30.86/9116  | 30.84/9114  |
|               | $3\times 3$ | 30.84/9124         | 31.06/9157  | 31.09/9162  | 31.23/9182  |
|               | $4\times 4$ | 30.86/9132         | 31.14/9174  | 31.21/9184  | 31.40/9213  |
|               | $5\times 5$ | 30.86/9134         | 31.19/9184  | 31.27/9197  | 31.51/9231  |
|               | $6\times 6$ | 30.86/9134         | 31.21/9190  | 31.32/9205  | 31.57/9241  |
|               | $7\times 7$ | 30.85/9133         | 31.23/9194  | 31.35/9211  | 31.63/9250  |
|               | $8\times 8$ | 30.86/9133         | 31.24/9197  | 31.37/9215  | 31.66/9256  |
|               | $9\times 9$ | 30.85/9132         | 31.25/9199  | 31.39/9219  | 31.69/9260  |
| HCold [65]    | $2\times 2$ | 36.83/9683         | 36.85/9682  | 36.81/9679  | 36.94/9690  |
|               | $3\times 3$ | 36.92/9688         | 37.13/9701  | 37.14/9702  | 37.37/9717  |
|               | $4\times 4$ | 36.95/9692         | 37.21/9708  | 37.27/9712  | 37.52/9729  |
|               | $5\times 5$ | 37.01/9695         | 37.31/9714  | 37.39/9718  | 37.68/9737  |
|               | $6\times 6$ | 37.00/9696         | 37.33/9717  | 37.44/9723  | 37.76/9744  |
|               | $7\times 7$ | 37.00/9696         | 37.40/9719  | 37.52/9726  | 37.92/9749  |
|               | $8\times 8$ | 36.99/9696         | 37.41/9721  | 37.56/9729  | 38.00/9754  |
|               | $9\times 9$ | 36.99/9697         | 37.44/9722  | 37.60/9730  | 38.06/9756  |
| INRIA [46]    | $2\times 2$ | 30.63/9429         | 30.66/9431  | 30.58/9427  | 30.52/9418  |
|               | $3\times 3$ | 30.82/9458         | 30.91/9465  | 30.87/9466  | 30.94/9472  |
|               | $4\times 4$ | 30.90/9472         | 31.04/9484  | 31.02/9489  | 31.19/9509  |
|               | $5\times 5$ | 30.95/9483         | 31.14/9498  | 31.14/9506  | 31.27/9526  |
|               | $6\times 6$ | 30.94/9484         | 31.17/9503  | 31.18/9511  | 31.45/9533  |
|               | $7\times 7$ | 30.93/9485         | 31.20/9506  | 31.22/9515  | 31.51/9539  |
|               | $8\times 8$ | 30.92/9484         | 31.22/9507  | 31.24/9517  | 31.54/9540  |
|               | $9\times 9$ | 30.91/9481         | 31.22/9506  | 31.26/9516  | 31.56/9539  |
| STgantry [53] | $2\times 2$ | 30.84/9432         | 31.03/9449  | 31.09/9452  | 31.30/9468  |
|               | $3\times 3$ | 30.93/9447         | 31.39/9493  | 31.49/9503  | 31.86/9534  |
|               | $4\times 4$ | 31.02/9459         | 31.56/9510  | 31.69/9523  | 32.11/9558  |
|               | $5\times 5$ | 30.99/9459         | 31.58/9518  | 31.74/9534  | 32.18/9571  |
|               | $6\times 6$ | 31.03/9460         | 31.68/9525  | 31.85/9541  | 32.31/9580  |
|               | $7\times 7$ | 31.03/9459         | 31.70/9526  | 31.90/9545  | 32.40/9585  |
|               | $8\times 8$ | 31.04/9459         | 31.73/9528  | 31.96/9549  | 32.48/9591  |
|               | $9\times 9$ | 31.02/9457         | 31.74/9529  | 31.97/9550  | 32.50/9592  |

\* Note that, " $A\times A$ " below "EPIT(ours)" denotes the models are trained on the LFs with corresponding angular resolution.

## C. LF Angular SR

It is worth noting that the proposed spatial-angular correlation learning mechanism has large potential in multiple LF image processing tasks. In this section, we apply our proposed spatial-angular correlation learning mechanism to the LF angular SR task. We first introduce our EPIT-ASR model for LF angular SR. Then, we introduce the datasets and implementation details in our experiments. Finally, we present the preliminary but promising results as compared to the state-of-the-art LF angular SR methods.

### C.1. Upsampling

Since our EPIT is flexible to LFs with different angular resolutions (as demonstrated in Sec. A.2), the EPIT-ASR model can be built by changing the upsampling stage of EPIT.

Here, we follow [60, 27] to take the  $2\times 2 \rightarrow 7\times 7$  angu-

lar SR task as an example to introduce the angular upsampling module in our EPIT-ASR. Given the deep LF feature  $\mathbf{F} \in \mathbb{R}^{2\times 2\times H\times W\times C}$ , a  $2\times 2$  convolution without padding is first applied to the angular dimensions to generate an angular-downsampled feature  $\mathbf{F}_{down} \in \mathbb{R}^{1\times 1\times H\times W\times C}$ . Then, a  $1\times 1$  convolution is used to increase the channel dimension, followed by a 2D pixel-shuffling layer to generate the angular-upsampled feature  $\mathbf{F}_{up} \in \mathbb{R}^{7\times 7\times H\times W\times C}$ . Finally, a  $3\times 3$  convolution is applied to the spatial dimensions of  $\mathbf{F}_{up}$  to generate the final output  $\mathcal{L}_{RE} \in \mathbb{R}^{7\times 7\times H\times W}$ .

### C.2. Datasets and Implement Details

Following [27, 60], we conducted experiments on the HCInew [21] and HCold [65] datasets. All LFs in these datasets have an angular resolution of  $9\times 9$ . We cropped the central  $7\times 7$  SAIs with  $64\times 64$  spatial resolution as

Table III. Quantitative comparison of different SR methods on five datasets with different shearing values for  $2\times$  SR. We mark the best results in **red** and the second results in **blue**.

| Datasets       |    | Methods    |                   |            |            |            |             |                   |            |                   |                   |                   |                   |
|----------------|----|------------|-------------------|------------|------------|------------|-------------|-------------------|------------|-------------------|-------------------|-------------------|-------------------|
|                |    | Bicubic    | RCAN              | resLF      | LFSSR      | LF-ATO     | LF-InterNet | LF-DFnet          | MEG-Net    | LF-IINet          | LFT               | DistgSSR          | Ours              |
| EPFL [48]      | -4 | 29.95/9372 | <b>33.47/9640</b> | 32.41/9582 | 31.90/9550 | 32.59/9593 | 32.15/9573  | 32.69/9597        | 32.07/9560 | 32.24/9579        | 32.48/9587        | 32.29/9583        | <b>34.52/9734</b> |
|                | -3 | 29.92/9369 | <b>33.45/9637</b> | 32.38/9578 | 31.85/9548 | 32.58/9592 | 32.14/9572  | 32.68/9597        | 32.16/9564 | 32.27/9577        | 32.49/9587        | 32.29/9578        | <b>34.67/9746</b> |
|                | -2 | 29.89/9369 | <b>33.31/9632</b> | 32.36/9587 | 31.92/9561 | 32.37/9589 | 32.06/9571  | 32.47/9592        | 32.17/9574 | 32.37/9589        | 32.35/9587        | 32.65/9618        | <b>34.64/9749</b> |
|                | -1 | 29.83/9373 | 33.30/9634        | 33.01/9652 | 32.69/9640 | 33.06/9659 | 32.62/9636  | <b>33.41/9673</b> | 32.82/9653 | 33.29/9676        | 33.33/9676        | 33.37/9687        | <b>34.71/9756</b> |
|                | 0  | 29.74/9376 | 33.16/9634        | 33.62/9706 | 33.68/9744 | 34.27/9757 | 34.14/9760  | 34.40/9755        | 34.30/9773 | 34.68/9773        | 34.80/9781        | <b>34.81/9787</b> | <b>34.83/9775</b> |
|                | 1  | 29.87/9373 | 33.16/9629        | 32.81/9644 | 32.70/9639 | 32.67/9656 | 32.57/9642  | <b>33.19/9669</b> | 32.76/9647 | 33.12/9663        | 33.18/9675        | 33.01/9681        | <b>34.66/9760</b> |
|                | 2  | 29.91/9370 | <b>33.37/9633</b> | 32.28/9579 | 31.87/9548 | 32.47/9597 | 32.00/9569  | 32.45/9593        | 31.85/9560 | 32.15/9577        | 32.42/9598        | 32.04/9581        | <b>34.69/9750</b> |
|                | 3  | 29.94/9370 | <b>33.48/9638</b> | 32.32/9575 | 31.85/9543 | 32.56/9591 | 32.09/9569  | 32.61/9594        | 31.84/9545 | 32.19/9574        | 32.43/9585        | 32.17/9578        | <b>34.73/9747</b> |
|                | 4  | 29.98/9372 | <b>33.52/9641</b> | 32.40/9579 | 31.97/9550 | 32.57/9592 | 32.15/9572  | 32.68/9597        | 31.93/9554 | 32.19/9575        | 32.46/9586        | 32.15/9579        | <b>34.59/9736</b> |
|                |    |            |                   |            |            |            |             |                   |            |                   |                   |                   |                   |
| HCInew [21]    | -4 | 30.83/9343 | <b>34.59/9611</b> | 33.34/9533 | 32.57/9494 | 33.37/9545 | 32.99/9525  | 33.62/9554        | 32.91/9510 | 33.34/9534        | 33.35/9541        | 33.03/9523        | <b>36.77/9782</b> |
|                | -3 | 30.81/9342 | <b>34.65/9609</b> | 33.45/9543 | 32.61/9501 | 33.58/9558 | 33.06/9523  | 33.75/9562        | 33.16/9527 | 33.44/9542        | 33.51/9551        | 33.43/9554        | <b>37.05/9791</b> |
|                | -2 | 30.83/9344 | <b>34.60/9605</b> | 33.50/9594 | 32.58/9548 | 33.13/9599 | 32.91/9563  | 33.41/9609        | 33.33/9588 | 33.80/9618        | 33.37/9609        | 33.76/9644        | <b>36.98/9792</b> |
|                | -1 | 30.74/9349 | 34.42/9603        | 35.00/9704 | 34.19/9691 | 34.87/9716 | 34.29/9690  | 35.59/9739        | 34.51/9716 | <b>35.70/9748</b> | 35.49/9747        | 35.68/9754        | <b>37.21/9815</b> |
|                | 0  | 31.89/9356 | 34.98/9603        | 36.69/9739 | 36.81/9749 | 37.24/9767 | 37.28/9763  | 37.44/9773        | 37.42/9777 | 37.74/9790        | 37.84/9791        | <b>37.96/9796</b> | <b>38.23/9810</b> |
|                | 1  | 30.73/9350 | 34.14/9602        | 34.04/9649 | 33.90/9639 | 33.41/9660 | 33.63/9633  | 34.30/9681        | 34.06/9659 | <b>34.64/9682</b> | 34.33/9694        | 34.30/9691        | <b>36.83/9792</b> |
|                | 2  | 30.79/9344 | <b>34.30/9605</b> | 32.99/9547 | 32.64/9509 | 32.84/9566 | 32.65/9527  | 32.80/9560        | 32.43/9517 | 32.99/9546        | 33.10/9571        | 32.31/9546        | <b>36.31/9787</b> |
|                | 3  | 30.77/9341 | <b>34.39/9609</b> | 33.17/9523 | 32.70/9493 | 33.32/9545 | 33.03/9523  | 33.51/9553        | 32.59/9492 | 33.22/9529        | 33.32/9541        | 32.87/9521        | <b>36.56/9787</b> |
|                | 4  | 30.79/9343 | <b>34.36/9612</b> | 33.16/9530 | 32.74/9499 | 33.19/9545 | 32.99/9526  | 33.40/9553        | 32.61/9497 | 33.13/9532        | 33.21/9543        | 32.70/9521        | <b>36.40/9778</b> |
|                |    |            |                   |            |            |            |             |                   |            |                   |                   |                   |                   |
| HCTold [65]    | -4 | 36.85/9775 | <b>40.85/9875</b> | 39.36/9852 | 38.44/9833 | 39.18/9852 | 39.22/9851  | 39.55/9858        | 38.69/9837 | 38.93/9849        | 39.20/9851        | 39.17/9850        | <b>42.34/9929</b> |
|                | -3 | 36.83/9775 | <b>40.88/9874</b> | 39.57/9854 | 38.45/9837 | 39.35/9854 | 39.33/9853  | 39.76/9858        | 38.99/9843 | 39.18/9850        | 39.37/9851        | 39.40/9852        | <b>43.04/9936</b> |
|                | -2 | 36.84/9777 | <b>40.32/9871</b> | 38.84/9858 | 38.05/9841 | 38.33/9854 | 38.80/9852  | 38.70/9862        | 38.64/9851 | 38.90/9860        | 38.47/9855        | 39.53/9879        | <b>42.80/9938</b> |
|                | -1 | 36.71/9782 | <b>40.22/9873</b> | 40.43/9902 | 39.44/9891 | 39.60/9900 | 39.79/9895  | 40.96/9914        | 39.68/9899 | 41.19/9915        | 40.73/9913        | <b>41.45/9923</b> | <b>43.31/9952</b> |
|                | 0  | 37.69/9785 | 41.05/9875        | 43.42/9932 | 43.81/9938 | 44.20/9942 | 44.45/9946  | 44.23/9941        | 44.08/9942 | 44.84/9948        | 44.52/9945        | <b>44.94/9949</b> | <b>45.08/9949</b> |
|                | 1  | 36.66/9783 | 39.25/9869        | 39.85/9903 | 40.31/9904 | 38.42/9901 | 39.93/9903  | 40.18/9915        | 39.85/9905 | <b>40.88/9921</b> | 39.99/9916        | 40.50/9922        | <b>42.75/9942</b> |
|                | 2  | 36.74/9779 | <b>39.78/9871</b> | 38.77/9862 | 38.50/9844 | 38.25/9862 | 38.70/9856  | 38.41/9865        | 38.17/9847 | 38.64/9861        | 38.61/9867        | 38.33/9863        | <b>42.31/9939</b> |
|                | 3  | 36.76/9777 | <b>40.66/9876</b> | 39.31/9852 | 38.48/9834 | 39.10/9855 | 39.10/9852  | 39.45/9858        | 38.37/9832 | 39.00/9851        | 39.19/9853        | 38.90/9849        | <b>42.97/9939</b> |
|                | 4  | 36.80/9776 | <b>40.70/9877</b> | 39.21/9853 | 38.68/9838 | 39.03/9855 | 39.09/9853  | 39.35/9859        | 38.36/9834 | 38.68/9848        | 39.00/9851        | 38.68/9848        | <b>42.67/9935</b> |
|                |    |            |                   |            |            |            |             |                   |            |                   |                   |                   |                   |
| INRIA [46]     | -4 | 31.58/9566 | <b>35.40/9769</b> | 34.24/9719 | 33.75/9695 | 34.42/9725 | 33.99/9713  | 34.64/9736        | 33.89/9703 | 34.13/9719        | 34.37/9724        | 34.20/9720        | <b>36.46/9815</b> |
|                | -3 | 31.55/9566 | <b>35.39/9768</b> | 34.22/9717 | 33.71/9695 | 34.43/9726 | 34.04/9715  | 34.62/9736        | 33.95/9703 | 34.12/9715        | 34.39/9726        | 34.10/9710        | <b>36.67/9826</b> |
|                | -2 | 31.55/9567 | <b>35.22/9763</b> | 34.04/9715 | 33.59/9695 | 34.08/9718 | 33.87/9709  | 34.31/9726        | 33.91/9707 | 34.13/9721        | 34.11/9716        | 34.67/9749        | <b>36.67/9829</b> |
|                | -1 | 31.49/9573 | 35.26/9767        | 34.88/9767 | 34.59/9760 | 34.92/9770 | 34.56/9757  | 35.51/9790        | 34.69/9766 | 35.42/9790        | 35.26/9783        | <b>35.55/9799</b> | <b>36.79/9837</b> |
|                | 0  | 31.33/9577 | 35.01/9769        | 35.39/9804 | 35.28/9832 | 36.15/9842 | 35.80/9843  | 36.36/9840        | 36.09/9849 | 36.57/9853        | <b>36.59/9855</b> | <b>36.59/9859</b> | <b>36.67/9853</b> |
|                | 1  | 31.53/9573 | 35.04/9762        | 34.82/9765 | 34.83/9768 | 34.56/9772 | 34.73/9772  | 35.44/9793        | 34.93/9773 | <b>35.30/9782</b> | 35.21/9784        | 35.25/9795        | <b>36.80/9840</b> |
|                | 2  | 31.55/9567 | <b>35.29/9765</b> | 34.16/9721 | 33.75/9698 | 34.43/9735 | 33.99/9717  | 34.49/9737        | 33.75/9706 | 34.07/9720        | 34.46/9740        | 34.08/9726        | <b>36.75/9832</b> |
|                | 3  | 31.56/9565 | <b>35.41/9768</b> | 34.10/9710 | 33.65/9689 | 34.39/9725 | 33.94/9711  | 34.54/9732        | 33.61/9687 | 34.02/9712        | 34.37/9725        | 34.04/9715        | <b>36.75/9829</b> |
|                | 4  | 31.58/9565 | <b>35.43/9769</b> | 34.18/9715 | 33.80/9696 | 34.40/9724 | 34.01/9713  | 34.63/9736        | 33.72/9695 | 34.03/9713        | 34.36/9723        | 34.02/9715        | <b>36.59/9821</b> |
|                |    |            |                   |            |            |            |             |                   |            |                   |                   |                   |                   |
| STFgantry [53] | -4 | 29.83/9479 | <b>35.69/9833</b> | 33.73/9739 | 32.48/9677 | 34.19/9776 | 32.92/9715  | 34.70/9792        | 32.98/9702 | 33.87/9751        | 34.11/9775        | 33.58/9751        | <b>39.33/9947</b> |
|                | -3 | 29.80/9479 | <b>35.79/9832</b> | 33.78/9740 | 32.59/9688 | 34.44/9781 | 33.12/9723  | 34.78/9794        | 33.25/9714 | 33.92/9750        | 34.34/9778        | 33.89/9755        | <b>39.68/9950</b> |
|                | -2 | 29.82/9484 | <b>35.65/9831</b> | 33.83/9769 | 32.59/9716 | 33.70/9789 | 32.56/9734  | 34.26/9808        | 33.39/9754 | 34.31/9793        | 33.84/9792        | 34.05/9821        | <b>39.43/9950</b> |
|                | -1 | 29.72/9490 | 35.44/9830        | 35.56/9860 | 34.37/9837 | 35.89/9881 | 34.09/9831  | 36.46/9890        | 34.89/9860 | 36.53/9895        | 36.34/9895        | <b>36.65/9903</b> | <b>39.65/9952</b> |
|                | 0  | 31.06/9498 | 36.33/9831        | 38.36/9904 | 37.95/9898 | 39.64/9929 | 38.72/9909  | 39.61/9926        | 38.77/9915 | 39.86/9936        | <b>40.54/9941</b> | 40.40/9942        | <b>42.17/9957</b> |
|                | 1  | 29.72/9490 | 34.87/9830        | 34.97/9862 | 34.67/9846 | 34.64/9890 | 34.10/9851  | 35.60/9902        | 34.96/9862 | <b>35.78/9893</b> | 35.66/9906        | 35.15/9901        | <b>38.81/9949</b> |
|                | 2  | 29.79/9483 | <b>35.01/9829</b> | 33.66/9779 | 32.88/9721 | 33.85/9821 | 32.61/9740  | 33.85/9816        | 32.90/9750 | 33.97/9800        | 34.15/9827        | 32.70/9798        | <b>38.58/9947</b> |
|                | 3  | 29.77/9477 | <b>35.20/9831</b> | 33.45/9731 | 32.50/9676 | 33.96/9779 | 32.90/9715  | 34.18/9787        | 32.41/9683 | 33.53/9743        | 33.94/9777        | 33.02/9741        | <b>38.53/9949</b> |
|                | 4  | 29.80/9477 | <b>35.19/9832</b> | 33.39/9733 | 32.53/9679 | 33.72/9774 | 32.78/9714  | 34.18/9792        | 32.41/9685 | 33.43/9745        | 33.76/9773        | 32.78/9739        | <b>38.46/9947</b> |
|                |    |            |                   |            |            |            |             |                   |            |                   |                   |                   |                   |

groundtruth high angular resolution LFs, and selected the corner  $2\times 2$  SAIs as inputs.

Our EPIT-ASR was initialized using the Xavier algorithm [17], and trained using the Adam method [31] with  $\beta_1 = 0.9$ ,  $\beta_2 = 0.999$ . The initial learning rate was set to  $2\times 10^{-4}$  and halved after every 15 epochs. The training was stopped after 80 epochs. During the training phase, we performed random horizontal flipping, vertical flipping, and 90-degree rotation to augment the training data.

### C.3. Qualitative Results

Figure IV shows the quantitative and qualitative results achieved by different LF angular SR methods. It can be observed that the magnitude of errors for our EPIT-ASR is smaller than other methods, especially on the delicate texture areas (e.g., the letters in scene Dishes). As shown in the zoom-in regions, our method generates more faithful details with fewer artifacts.

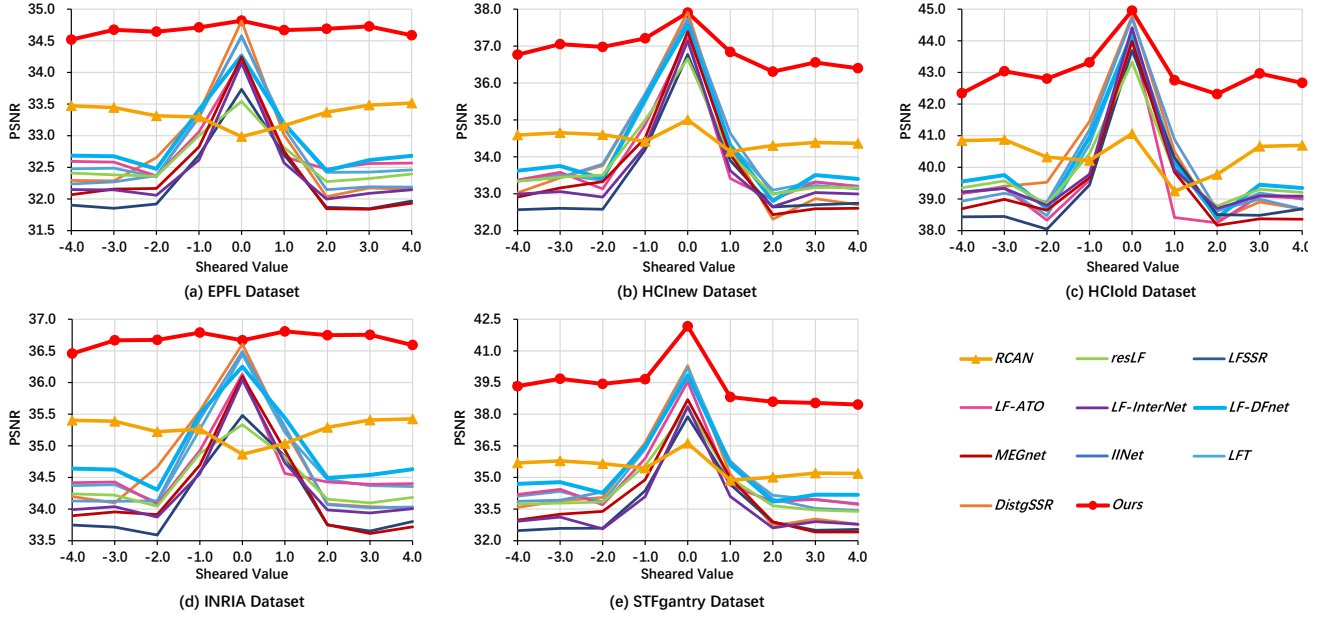

Figure II. Quantitative comparison of different SR methods on five datasets with different shearing values for  $2\times$  SR.

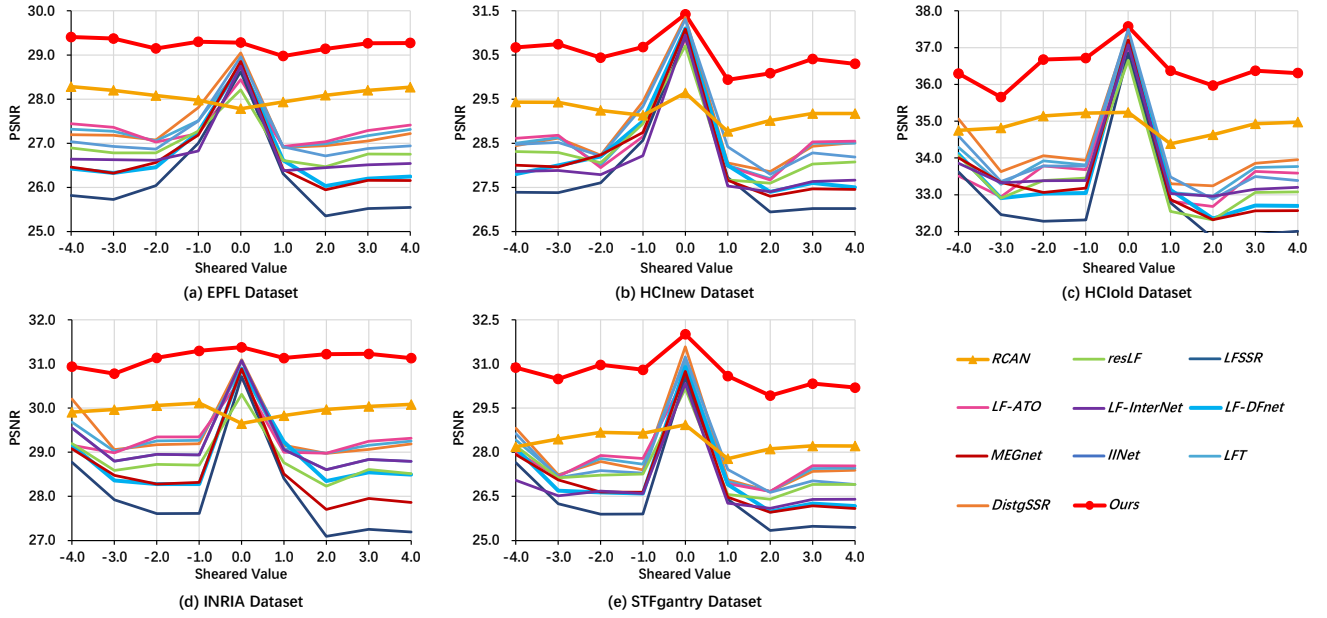

Figure III. Quantitative comparison of different SR methods on five datasets with different shearing values for  $4\times$  SR.



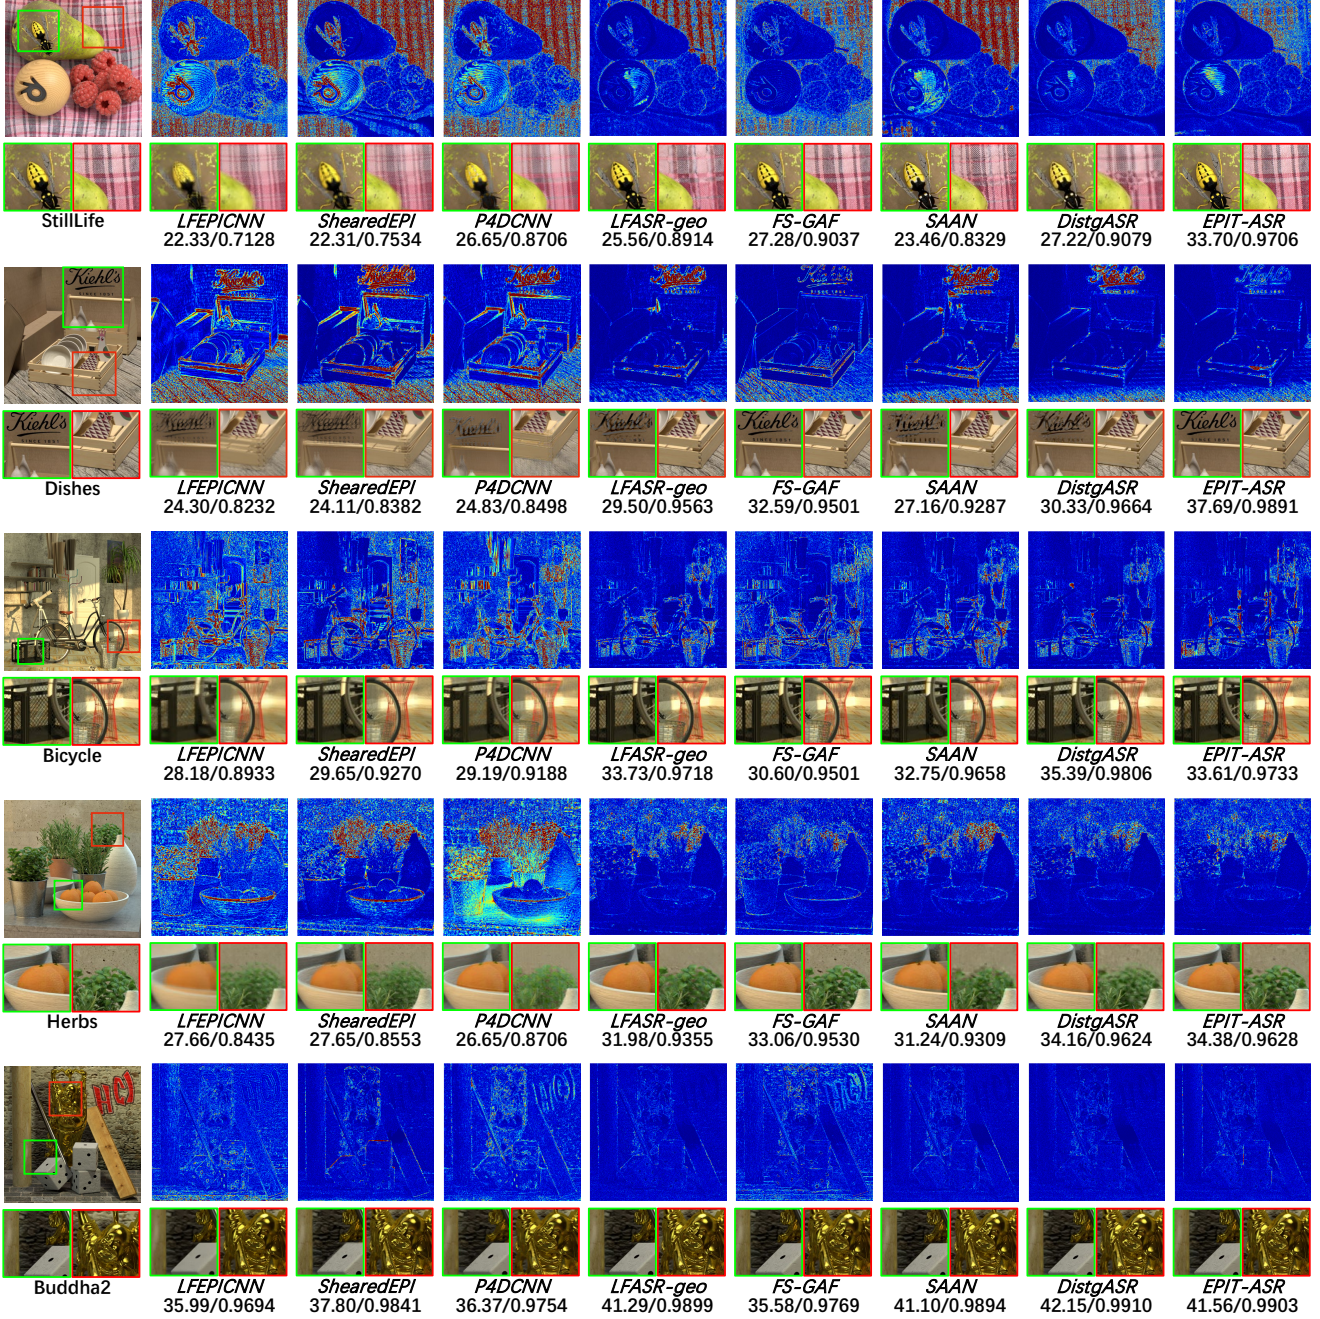

Figure IV. Visual results achieved by different methods on scenes StillLife, Dishes, Bicycle, Herbs and Buddha2 for  $2\times 2 \rightarrow 7\times 7$  angular SR. Here, we show the error maps of the reconstructed center view images, along with two zoom-in regions for qualitative comparison. The PSNR and SSIM values achieved on each scene are reported for quantitative comparison. Zoom in for the best view.
